# Supplementary material for: Overexpression of NPR1 in Brassica juncea Confers Broad Spectrum Resistance to Fungal Pathogens
Source: PubMed Central journal article supplement (PMC5632730; doi:10.3389/fpls.2017.01693), 2017-10-04

**Figure S1**

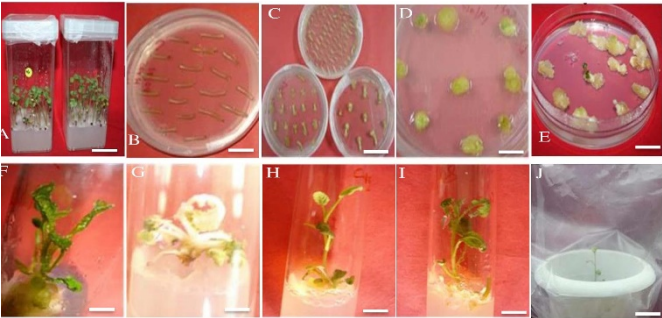

Supplement: Image_1.pdf [file Image_1.pdf]
