# Supplementary material for: Overexpression of NPR1 in Brassica juncea Confers Broad Spectrum Resistance to Fungal Pathogens
Source: PubMed Central journal article supplement (PMC5632730; doi:10.3389/fpls.2017.01693), 2017-10-04
Supplement: Table_1.pdf [file Table_1.pdf]

**TABLE S1 Overall transformation efficiency in *B. juncea* using co-cultivation method**

| <b>No of Batches</b> | <b>No of hypocotyls transformed</b> | <b>Positive plants obtained</b> | <b>Transformation Efficiency (%)</b> |
|----------------------|-------------------------------------|---------------------------------|--------------------------------------|
| 23                   | 1080                                | 15                              | 2.71                                 |
